# Supplementary material
Source: MDPI journal article supplement (https://www.mdpi.com/2073-4336/14/1/8)
Supplement: s1 [file s1]

### Supplementary tables

**Table S1.** Repeated-measures ANCOVA on trust decisions.

|                                      | <i>Sum of<br/>Squares</i> | <i>df</i> | <i>F</i> | <i>p</i>     | $\eta_p^2$ |
|--------------------------------------|---------------------------|-----------|----------|--------------|------------|
| Partner                              | 0.52                      | 1         | 0.469    | 0.495        | 0.004      |
| Partner * Gender                     | 0.63                      | 1         | 0.565    | 0.454        | 0.005      |
| Partner * Distrust Scale             | 3.73                      | 1         | 3.344    | 0.070        | 0.029      |
| Partner * RSQ_Desire For<br>Intimacy | 0.63                      | 1         | 0.568    | 0.453        | 0.005      |
| Partner * PNR_PR                     | 0.38                      | 1         | 0.344    | 0.559        | 0.003      |
| Partner * Game                       | 9.63                      | 1         | 8.625    | <b>0.004</b> | 0.072      |
| Error(Partner)                       | 123.96                    | 111       |          |              |            |
| Gender                               | 4.59                      | 1         | 0.422    | 0.517        | 0.004      |
| Distrust Scale                       | 0.20                      | 1         | 0.019    | 0.891        | 0.000      |
| RSQ_Desire For Intimacy              | 12.71                     | 1         | 1.167    | 0.282        | 0.010      |
| PNR_PR                               | 0.07                      | 1         | 0.007    | 0.932        | 0.000      |
| Game                                 | 15.50                     | 1         | 1.424    | 0.235        | 0.013      |
| Error                                | 1208.59                   | 111       |          |              |            |

*Note.* The bold numbers indicate significant differences.

PNR\_PR, Personal Norm of Reciprocity Scale, positive reciprocity; RSQ, Relationship Scales Questionnaires.

**Table S2.** Repeated-measures Analysis of Covariance (ANCOVA) on the response time of making trust decisions.

| Source                               | <i>Sum of Squares</i> | <i>df</i> | <i>F</i> | <i>p</i> | $\eta_p^2$ |
|--------------------------------------|-----------------------|-----------|----------|----------|------------|
| Partner                              | 56552.25              | 1         | 0.390    | 0.533    | 0.004      |
| Partner * Gender                     | 63673.88              | 1         | 0.440    | 0.509    | 0.004      |
| Partner * Distrust Scale             | 47374.27              | 1         | 0.327    | 0.569    | 0.003      |
| Partner * RSQ_Desire<br>For Intimacy | 1535.01               | 1         | 0.011    | 0.918    | 0.000      |
| Partner * PNR_PR                     | 88.19                 | 1         | 0.001    | 0.980    | 0.000      |
| Partner * Game                       | 143264.01             | 1         | 0.989    | 0.322    | 0.009      |
| Error(Partner)                       | 16080077.09           | 111       |          |          |            |
| Gender                               | 758725.16             | 1         | 0.820    | 0.367    | 0.007      |
| Distrust Scale                       | 156496.91             | 1         | 0.169    | 0.682    | 0.002      |
| PNR_PR                               | 1423671.90            | 1         | 1.539    | 0.217    | 0.014      |
| RSQ_Desire For<br>Intimacy           | 120737.62             | 1         | 0.131    | 0.719    | 0.001      |
| Game                                 | 1190984.79            | 1         | 1.288    | 0.259    | 0.011      |
| Error                                | 102671130.40          | 111       |          |          |            |

PNR\_PR, Personal Norm of Reciprocity Scale, positive reciprocity; RSQ, Relationship Scales Questionnaires.

**Table S3.** Hierarchical linear regression analysis on trust in the distrust game (DTG) and trust game (TG).

| Predictors       | DTG         |            |          |                | TG          |            |          |                |
|------------------|-------------|------------|----------|----------------|-------------|------------|----------|----------------|
|                  | <i>Beta</i> | <i>SE.</i> | <i>t</i> | <i>p</i>       | <i>Beta</i> | <i>SE.</i> | <i>t</i> | <i>p</i>       |
| <i>Model 1</i>   |             |            |          |                |             |            |          |                |
| Constant         | -1.48       | 1.43       | -1.03    | 0.302          | 10.32       | 2.00       | 5.15     | < <b>0.001</b> |
| Gender           | 0.82        | 0.20       | 3.97     | < <b>0.001</b> | 0.21        | 0.16       | 1.32     | 0.186          |
| Subject          | -0.10       | 0.01       | -9.65    | < <b>0.001</b> | -0.03       | 0.01       | -4.17    | < <b>0.001</b> |
| Trust_WVS        | -0.08       | 0.20       | -0.40    | 0.683          | -1.01       | 0.21       | -4.73    | < <b>0.001</b> |
| Trust strangers  | -1.16       | 0.19       | -6.05    | < <b>0.001</b> | 1.01        | 0.12       | 7.84     | < <b>0.001</b> |
| PIFT             | 1.16        | 0.16       | 7.10     | < <b>0.001</b> | 0.59        | 0.12       | 4.66     | < <b>0.001</b> |
| SVO              | -0.04       | 0.01       | -4.12    | < <b>0.001</b> | 0.03        | 0.01       | 4.94     | < <b>0.001</b> |
| Distrust         | -0.21       | 0.09       | -2.35    | <b>0.019</b>   | 0.46        | 0.11       | 3.97     | < <b>0.001</b> |
| Moral Identity   | 0.30        | 0.06       | 4.90     | < <b>0.001</b> | -0.21       | 0.05       | -3.85    | < <b>0.001</b> |
| IRI              | 0.02        | 0.00       | 3.05     | <b>0.002</b>   | -0.07       | 0.01       | -6.07    | < <b>0.001</b> |
| General Trust    | -0.00       | 0.086      | -0.01    | 0.991          | 0.36        | 0.08       | 4.47     | < <b>0.001</b> |
| PRNR             | -0.12       | 0.069      | -1.72    | 0.084          | 0.08        | 0.06       | 1.45     | 0.147          |
| Zero-sum         | 0.99        | 0.128      | 7.74     | < <b>0.001</b> | 1.08        | 0.12       | 9.04     | < <b>0.001</b> |
| PNR_BR           | -0.06       | 0.168      | -0.38    | 0.697          | 0.05        | 0.13       | 0.36     | 0.713          |
| PNR_PR           | -0.01       | 0.15       | -0.08    | 0.931          | 0.48        | 0.10       | 4.56     | < <b>0.001</b> |
| PNR_NR           | 0.45        | 0.141      | 3.25     | <b>0.001</b>   | 0.25        | 0.08       | 2.89     | <b>0.004</b>   |
| NEO-PI-R_M       | 2.33        | 0.23       | 9.97     | < <b>0.001</b> | -0.25       | 0.20       | -1.25    | 0.208          |
| RSQ_Independence | 0.47        | 0.16       | 2.84     | <b>0.005</b>   | -0.74       | 0.15       | -4.76    | < <b>0.001</b> |
| RSQ_Dependence   | -1.09       | 0.18       | -5.91    | < <b>0.001</b> | -0.46       | 0.17       | -2.60    | <b>0.009</b>   |

|                            |       |       |        |                  |       |       |        |                  |
|----------------------------|-------|-------|--------|------------------|-------|-------|--------|------------------|
| RSQ_Lack of Trust          | 1.23  | 0.24  | 4.95   | <b>&lt;0.001</b> | -0.87 | 0.20  | -4.33  | <b>&lt;0.001</b> |
| RSQ_Anxiety                | -0.89 | 0.17  | -5.09  | <b>&lt;0.001</b> | 0.10  | 0.16  | 0.59   | 0.556            |
| RSQ_Desire for Intimacy    | -0.91 | 0.143 | -6.44  | <b>&lt;0.001</b> | -0.34 | 0.12  | -2.72  | <b>0.007</b>     |
| RSQ_Avoidance              | -1.12 | 0.22  | -5.08  | <b>&lt;0.001</b> | -0.74 | 0.24  | -3.11  | <b>0.002</b>     |
| Self-reported Trust        | -0.26 | 0.02  | -10.95 | <b>&lt;0.001</b> | 0.33  | 0.03  | 11.14  | <b>&lt;0.001</b> |
| ITSQ                       | -0.45 | 0.17  | -2.64  | <b>0.008</b>     | -0.91 | 0.14  | -6.52  | <b>&lt;0.001</b> |
| <i>R Square</i>            |       |       | 0.299  |                  |       |       | 0.308  |                  |
| <i>F change</i>            |       |       | 27.768 |                  |       |       | 28.338 |                  |
| <i>Sig. F change</i>       |       |       | <0.001 |                  |       |       | <0.001 |                  |
| <hr/> <i>Model 2</i> <hr/> |       |       |        |                  |       |       |        |                  |
| Constant                   | 1.47  | 1.42  | 1.03   | 0.302            | 7.26  | 1.95  | 3.70   | <b>&lt;0.001</b> |
| Gender                     | 0.67  | 0.20  | 3.34   | <b>0.001</b>     | 0.62  | 0.15  | 3.93   | <b>&lt;0.001</b> |
| Subject                    | -0.11 | 0.01  | -10.58 | <b>&lt;0.001</b> | -0.03 | 0.00  | -4.38  | <b>&lt;0.001</b> |
| Trust_WVS                  | -0.23 | 0.19  | -1.17  | 0.24             | -0.57 | 0.20  | -2.81  | <b>0.005</b>     |
| Trust strangers            | -1.29 | 0.18  | -6.88  | <b>&lt;0.001</b> | 0.73  | 0.12  | 5.92   | <b>&lt;0.001</b> |
| PIFT                       | 1.15  | 0.159 | 7.25   | <b>&lt;0.001</b> | 0.61  | 0.12  | 5.02   | <b>&lt;0.001</b> |
| SVO                        | -0.04 | 0.01  | -4.21  | <b>&lt;0.001</b> | 0.02  | 0.01  | 2.83   | <b>0.005</b>     |
| Distrust                   | -0.25 | 0.09  | -2.75  | <b>0.006</b>     | 0.35  | 0.11  | 3.18   | <b>0.001</b>     |
| Moral Identity             | 0.34  | 0.06  | 5.82   | <b>&lt;0.001</b> | -0.09 | 0.05  | -1.79  | 0.072            |
| IRI                        | 0.02  | 0.01  | 3.11   | <b>0.002</b>     | -0.06 | 0.01  | -5.84  | <b>&lt;0.001</b> |
| General Trust              | 0.02  | 0.08  | 0.34   | 0.729            | 0.40  | 0.078 | 5.19   | <b>&lt;0.001</b> |
| PRNR                       | -0.11 | 0.06  | -1.75  | 0.08             | 0.02  | 0.05  | 0.38   | 0.699            |
| Zero-sum                   | 1.01  | 0.12  | 8.18   | <b>&lt;0.001</b> | 0.96  | 0.11  | 8.37   | <b>&lt;0.001</b> |

|                        |       |      |        |                  |       |      |        |                  |
|------------------------|-------|------|--------|------------------|-------|------|--------|------------------|
| PNR_BR                 | -0.05 | 0.16 | -0.31  | 0.753            | 0.23  | 0.12 | 1.83   | 0.067            |
| PNR_PR                 | 0.07  | 0.14 | 0.52   | 0.599            | 0.19  | 0.10 | 1.85   | 0.064            |
| PNR_NR                 | 0.44  | 0.13 | 3.25   | <b>0.001</b>     | 0.13  | 0.08 | 1.59   | 0.110            |
| NEO-PI-R_M             | 2.26  | 0.22 | 9.97   | <b>&lt;0.001</b> | -0.54 | 0.19 | -2.84  | <b>0.005</b>     |
| RSQ_Independence       | 0.12  | 0.16 | 0.77   | 0.441            | -0.83 | 0.14 | -5.66  | <b>&lt;0.001</b> |
| RSQ_Dependence         | -1.17 | 0.18 | -6.43  | <b>&lt;0.001</b> | -0.25 | 0.17 | -1.47  | 0.140            |
| RSQ_LackofTrust        | 0.89  | 0.24 | 3.66   | <b>&lt;0.001</b> | -0.67 | 0.19 | -3.53  | <b>&lt;0.001</b> |
| RSQ_Anxiety            | -1.19 | 0.17 | -6.89  | <b>&lt;0.001</b> | 0.07  | 0.16 | 0.44   | 0.657            |
| RSQ_Desire4Intimacy    | -0.79 | 0.13 | -5.70  | <b>&lt;0.001</b> | -0.38 | 0.12 | -3.20  | <b>&lt;0.001</b> |
| RSQ_Avoidance          | -0.59 | 0.22 | -2.66  | <b>0.008</b>     | -0.70 | 0.22 | -3.10  | <b>0.002</b>     |
| Self-reported Trust    | -0.28 | 0.02 | -11.85 | <b>&lt;0.001</b> | 0.27  | 0.02 | 9.66   | <b>&lt;0.001</b> |
| ITSQ                   | -0.23 | 0.16 | -1.38  | 0.165            | -0.59 | 0.13 | -4.42  | <b>&lt;0.001</b> |
| Trustworthiness rating | -0.14 | 0.06 | -2.22  | <b>0.026</b>     | 0.45  | 0.05 | 7.85   | <b>&lt;0.001</b> |
| Attractiveness rating  | 0.06  | 0.05 | 1.11   | 0.263            | 0.10  | 0.05 | 1.91   | 0.056            |
| Expected return        | -4.14 | 0.46 | -8.90  | <b>&lt;0.001</b> | 2.44  | 0.48 | 5.04   | <b>&lt;0.001</b> |
| <i>R Square</i>        |       |      | 0.343  |                  |       |      | 0.385  |                  |
| <i>F change</i>        |       |      | 34.788 |                  |       |      | 64.073 |                  |
| <i>Sig. F change</i>   |       |      | <0.001 |                  |       |      | <0.001 |                  |

*Note.* The bold numbers indicate significant differences.

Trust\_WVS, trust measured by the world value survey question; PIFT, pay-it-forward tendency; SVO, social value orientation; IRI, Interpersonal Reactivity Index; PRNR, positive reciprocity and negative reciprocity; PNR\_BR, Personal Norm of Reciprocity, subscale of Belief In Reciprocity; PNR\_PR, Personal Norm of Reciprocity, subscale of positive reciprocity; PNR\_NR, Personal Norm of Reciprocity, subscale of negative

reciprocity; NEO-PI-R, Revised NEO Personality Inventory, subscale of trust; RSQ, Relationship Scales Questionnaires; ITSQ, interpersonal trust scenario questionnaire.

Predictors in Model 1 included Constant, Subjects, Gender, and self-reported traits; Predictors in Model 2 included Constant, Subjects, Gender, self-reported traits, trustworthiness rating, attractive rating, and expected percentage of return.

**Table S4.** Descriptive ( $M$  [ $SD$ ]) and  $t$ -test results on expected percentage of return in the trust game (TG) and distrust game (DTG) groups.

| Trust Levels | DTG group (n=59) | TG group (n=58) | $t$ value | $p$ -value       | Cohen's $d$ |
|--------------|------------------|-----------------|-----------|------------------|-------------|
| Trust 0      | 13 (18)          | 0 (5)           | 2.62      | <b>0.015</b>     | 0.93        |
| Trust 1      | 9 (11)           | 14 (13)         | -1.24     | 0.222            | -0.44       |
| Trust 2      | 28 (18)          | 24 (8)          | 0.84      | 0.406            | 0.26        |
| Trust 3      | 26 (15)          | 29 (8)          | -0.86     | 0.394            | -0.22       |
| Trust 4      | 31 (13)          | 34 (10)         | -1.01     | 0.313            | -0.22       |
| Trust 5      | 32 (13)          | 38(8)           | -2.56     | <b>0.012</b>     | -0.54       |
| Trust 6      | 35 (13)          | 43(10)          | -3.20     | <b>0.002</b>     | -0.68       |
| Trust 7      | 37 (12)          | 50 (11)         | -4.49     | <b>&lt;0.001</b> | -1.08       |
| Trust 8      | 40 (14)          | 49 (16)         | -2.26     | <b>0.029</b>     | -0.65       |
| Trust 9      | 43 (12)          | 49 (09)         | -1.71     | 0.098            | -0.55       |
| Trust 10     | 49 (8)           | 51 (12)         | -0.58     | 0.560            | -0.17       |

*Note.* The bold numbers indicate significant differences.

**Table S5.** Repeated-measures Analysis of Covariance (ANCOVA) on the percentage of return.

| Source                            | <i>Sum of Squares</i> | <i>df</i> | <i>F</i> | <i>p</i>     | $\eta_p^2$ |
|-----------------------------------|-----------------------|-----------|----------|--------------|------------|
| Partner                           | 0.001                 | 1         | 0.168    | 0.682        | 0.002      |
| Partner * Gender                  | 0.001                 | 1         | 0.184    | 0.669        | 0.002      |
| Partner * Distrust Scale          | 0.004                 | 1         | 0.820    | 0.367        | 0.008      |
| Partner * PNR_PR                  | 0.011                 | 1         | 2.028    | 0.157        | 0.019      |
| Partner * RSQ_Desire For Intimacy | 0.003                 | 1         | 0.545    | 0.462        | 0.005      |
| Partner * Trust_com               | 0.003                 | 1         | 0.582    | 0.447        | 0.005      |
| Partner * Trust_human             | 0.004                 | 1         | 0.755    | 0.387        | 0.007      |
| Partner * Game                    | 0.002                 | 1         | 0.419    | 0.519        | 0.004      |
| Error(Partner)                    | 0.557                 | 106       |          |              |            |
| Gender                            | 0.001                 | 1         | 0.037    | 0.848        | 0.000      |
| Distrust Scale                    | <0.001                | 1         | 0.001    | 0.971        | 0.000      |
| PNR_PR                            | 0.001                 | 1         | 0.091    | 0.763        | 0.001      |
| RSQ_Desire For Intimacy           | 0.034                 | 1         | 2.086    | 0.152        | 0.019      |
| Trust_computer                    | 0.012                 | 1         | 0.720    | 0.398        | 0.007      |
| Trust_human                       | 0.012                 | 1         | 0.763    | 0.384        | 0.007      |
| Game                              | 0.174                 | 1         | 10.624   | <b>0.002</b> | 0.091      |
| Error                             | 1.733                 | 106       |          |              |            |

*Note.* The bold numbers indicate significant differences.

PNR\_PR, Personal Norm of Reciprocity Scale, positive reciprocity; RSQ,



## Relationship Scales Questionnaires.

**Table S6.** Repeated-measures Analysis of Covariance (ANCOVA) on the response time of making reciprocity decisions.

| Source                               | <i>Sum of<br/>Squares</i> | <i>df</i> | <i>F</i> | <i>p</i>     | $\eta_p^2$ |
|--------------------------------------|---------------------------|-----------|----------|--------------|------------|
| Partner                              | 19855133.87               | 1         | 3.105    | 0.081        | 0.028      |
| Partner * Gender                     | 1479416.36                | 1         | 0.231    | 0.632        | 0.002      |
| Partner * Distrust Scale             | 5302389.34                | 1         | 0.829    | 0.365        | 0.008      |
| Partner * PNR_PR                     | 115298.07                 | 1         | 0.018    | 0.893        | 0.000      |
| Partner * RSQ_Desire<br>For Intimacy | 10632610.2                | 1         | 1.663    | 0.200        | 0.015      |
| Partner * Trust_com                  | 3441114.05                | 1         | 0.538    | 0.465        | 0.005      |
| Partner * Trust_human                | 141506.40                 | 1         | 0.022    | 0.882        | 0.000      |
| Partner * Game                       | 5030318.97                | 1         | 0.787    | 0.377        | 0.007      |
| Error(Partner)                       | 677860293.2               | 106       |          |              |            |
| Gender                               | 57419011.61               | 1         | 2.211    | 0.140        | 0.020      |
| Distrust Scale                       | 5928194.27                | 1         | 0.228    | 0.634        | 0.002      |
| PNR_PR                               | 1388209.39                | 1         | 0.053    | 0.818        | 0.001      |
| RSQ_Desire For<br>Intimacy           | 2075352.07                | 1         | 0.080    | 0.778        | 0.001      |
| Trust_computer                       | 63666429.44               | 1         | 2.452    | 0.120        | 0.023      |
| Trust_human                          | 120779049.7               | 1         | 4.652    | <b>0.033</b> | 0.042      |
| Game                                 | 208020451.1               | 1         | 8.012    | <b>0.006</b> | 0.070      |
| Error                                | 2752281352                | 106       |          |              |            |

*Note.* The bold numbers indicate significant differences.

PNR\_PR, Personal Norm of Reciprocity Scale, positive reciprocity; RSQ, Relationship Scales Questionnaires.

**Table S7.** Descriptive ( $M$  [ $SD$ ]) and  $t$ -test results on the percentage returned for computer and human partners upon each trust level in the trust game (TG) and distrust game (DTG) groups.

| Trust Levels      | DTG group ( $n = 59$ ) | TG group ( $n = 58$ ) | $t$ value | $p$ -value   | Cohen's $d$ |
|-------------------|------------------------|-----------------------|-----------|--------------|-------------|
| Computer partners |                        |                       |           |              |             |
| Trust 0           | 5 (17)                 | 1 (8)                 | 1.55      | 0.124        | 0.30        |
| Trust 1           | 5 (8)                  | 7 (8)                 | -1.27     | 0.204        | -0.24       |
| Trust 2           | 8 (10)                 | 12 (12)               | -1.92     | 0.057        | -0.36       |
| Trust 3           | 10 (12)                | 17 (14)               | -2.77     | <b>0.007</b> | -0.51       |
| Trust 4           | 14 (12)                | 22 (14)               | -3.07     | <b>0.003</b> | -0.58       |
| Trust 5           | 16 (14)                | 26 (15)               | -3.61     | <b>0.000</b> | -0.67       |
| Trust 6           | 20 (15)                | 30 (16)               | -3.38     | <b>0.001</b> | -0.63       |
| Trust 7           | 25 (17)                | 32 (17)               | -2.27     | <b>0.025</b> | -0.42       |
| Trust 8           | 28 (18)                | 32 (19)               | -1.29     | 0.197        | -0.24       |
| Trust 9           | 28 (20)                | 36 (19)               | -2.28     | <b>0.024</b> | -0.42       |
| Trust 10          | 36 (21)                | 40 (19)               | -1.16     | 0.245        | -0.21       |
| Human partners    |                        |                       |           |              |             |
| Trust 0           | 2 (10)                 | 0 (00)                | 1.56      | 0.124        | 0.33        |
| Trust 1           | 10 (16)                | 9 (8)                 | 0.17      | 0.863        | 0.05        |
| Trust 2           | 11 (11)                | 15 (8)                | -2.20     | <b>0.031</b> | -0.47       |
| Trust 3           | 14 (13)                | 23 (9)                | -4.41     | <b>0.000</b> | -0.83       |

|          |         |         |       |              |        |
|----------|---------|---------|-------|--------------|--------|
| Trust 4  | 19 (14) | 28 (9)  | -4.39 | <b>0.000</b> | -0.82  |
| Trust 5  | 24 (14) | 35 (9)  | -4.92 | <b>0.000</b> | -0.92  |
| Trust 6  | 26 (12) | 37 (9)  | -5.33 | <b>0.000</b> | -1.00  |
| Trust 7  | 31 (13) | 36 (15) | -2.15 | <b>0.033</b> | -0.40  |
| Trust 8  | 32 (16) | 38 (17) | -1.82 | 0.071        | -0.34  |
| Trust 9  | 39 (14) | 42 (15) | -0.91 | 0.363        | -0.217 |
| Trust 10 | 47 (14) | 48 (10) | -0.34 | 0.728        | -0.065 |

---

*Note.* The bold numbers indicate significant differences.
